# Supplementary material for: Effects of stabilized hypochlorous acid on oral biofilm bacteria
Source: Springer Nature journal article supplement (doi:10.1186/s12903-022-02453-2), 2022-09-20
Supplement: MOESM2 [file 23516154]

Supplementary Fig. 2

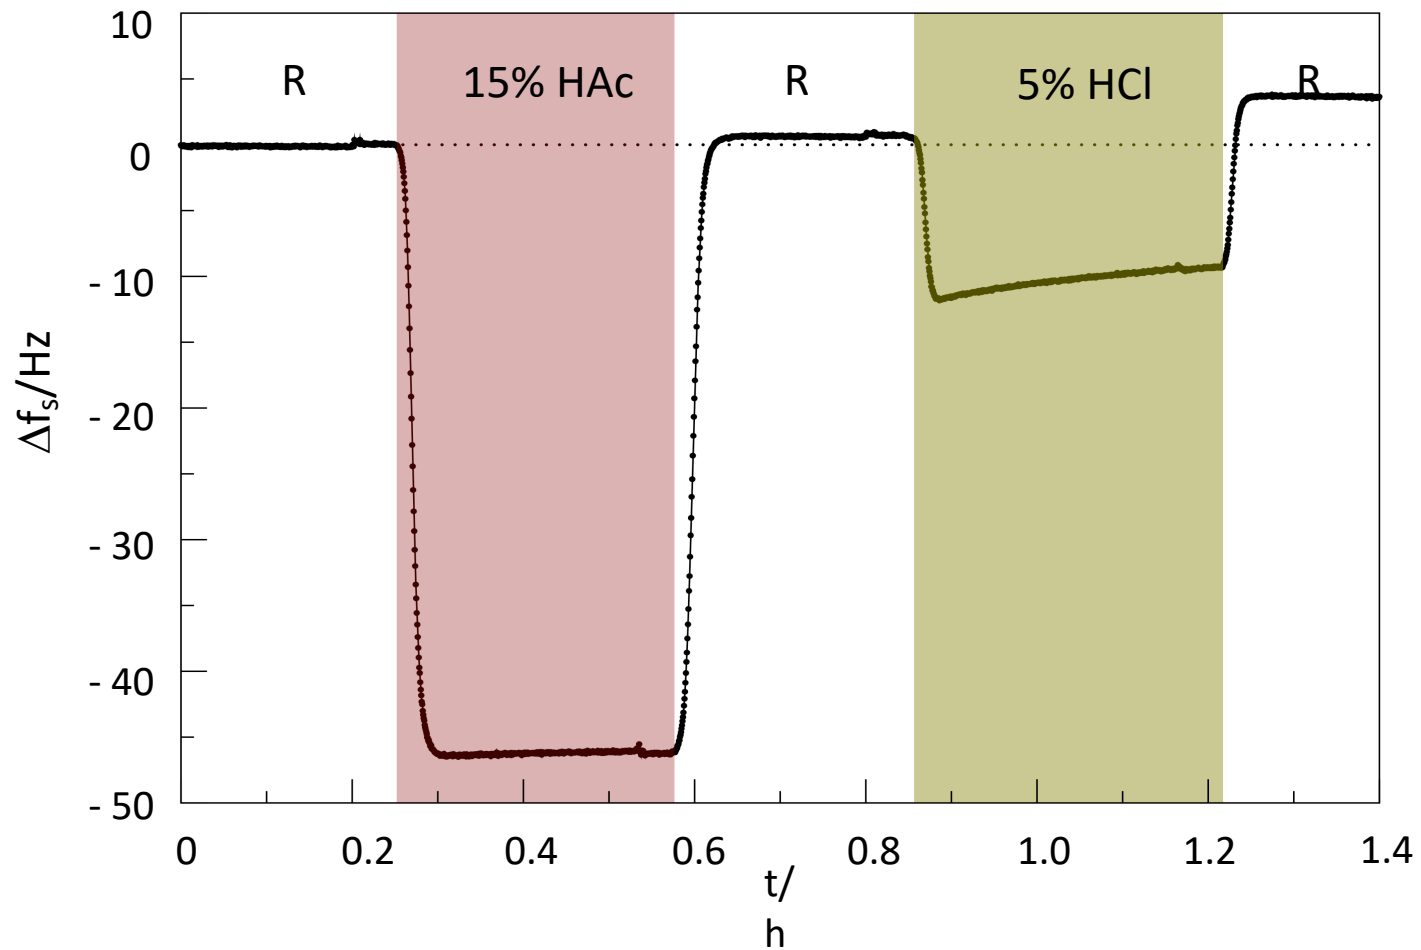

Supplementary Fig. 2. QCM-D data showing the shift of  $\Delta f_5$  values for solutions of 15% HAc (red zone, pH 2.3) and 5% HCl (green zone, pH 0.3) as a function of exposure time. White zones (R) show rinsing of the HA surface with Milli Q water.
